# Supplementary material for: Response Mechanism of Polymeric Liquid Junction-Free Reference Electrodes Based on Organic Electrolytes
Source: MDPI journal article supplement (doi:10.3390/membranes13010118), 2023-01-16
Supplement: s1 [file s1]

Supplementary material

# Response Mechanism of Polymeric Liquid Junction-Free Reference Electrodes Based on Organic Electrolytes

Andrey V. Kalinichev \*, Nadezhda V. Pokhvishcheva and Maria A. Peshkova

Institute of Chemistry, Saint Petersburg State University, 26 Universitetskii prospect,  
198504 Saint Petersburg, Russia

\* Correspondence: andre.kalinichev@gmail.com

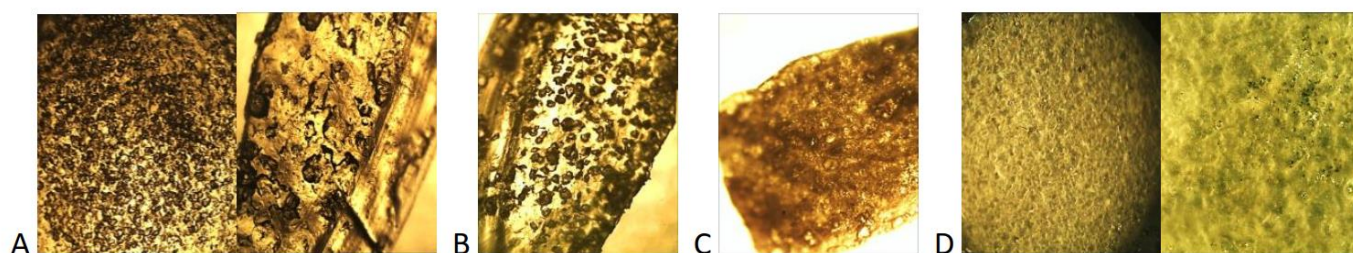

**Figure S1.** Freshly prepared (A); 5 min (B); 1 day (C) and 1 week (D) conditioned membranes containing TBATBB and dry KCl. Conditioning solution: 0.01 M KCl.

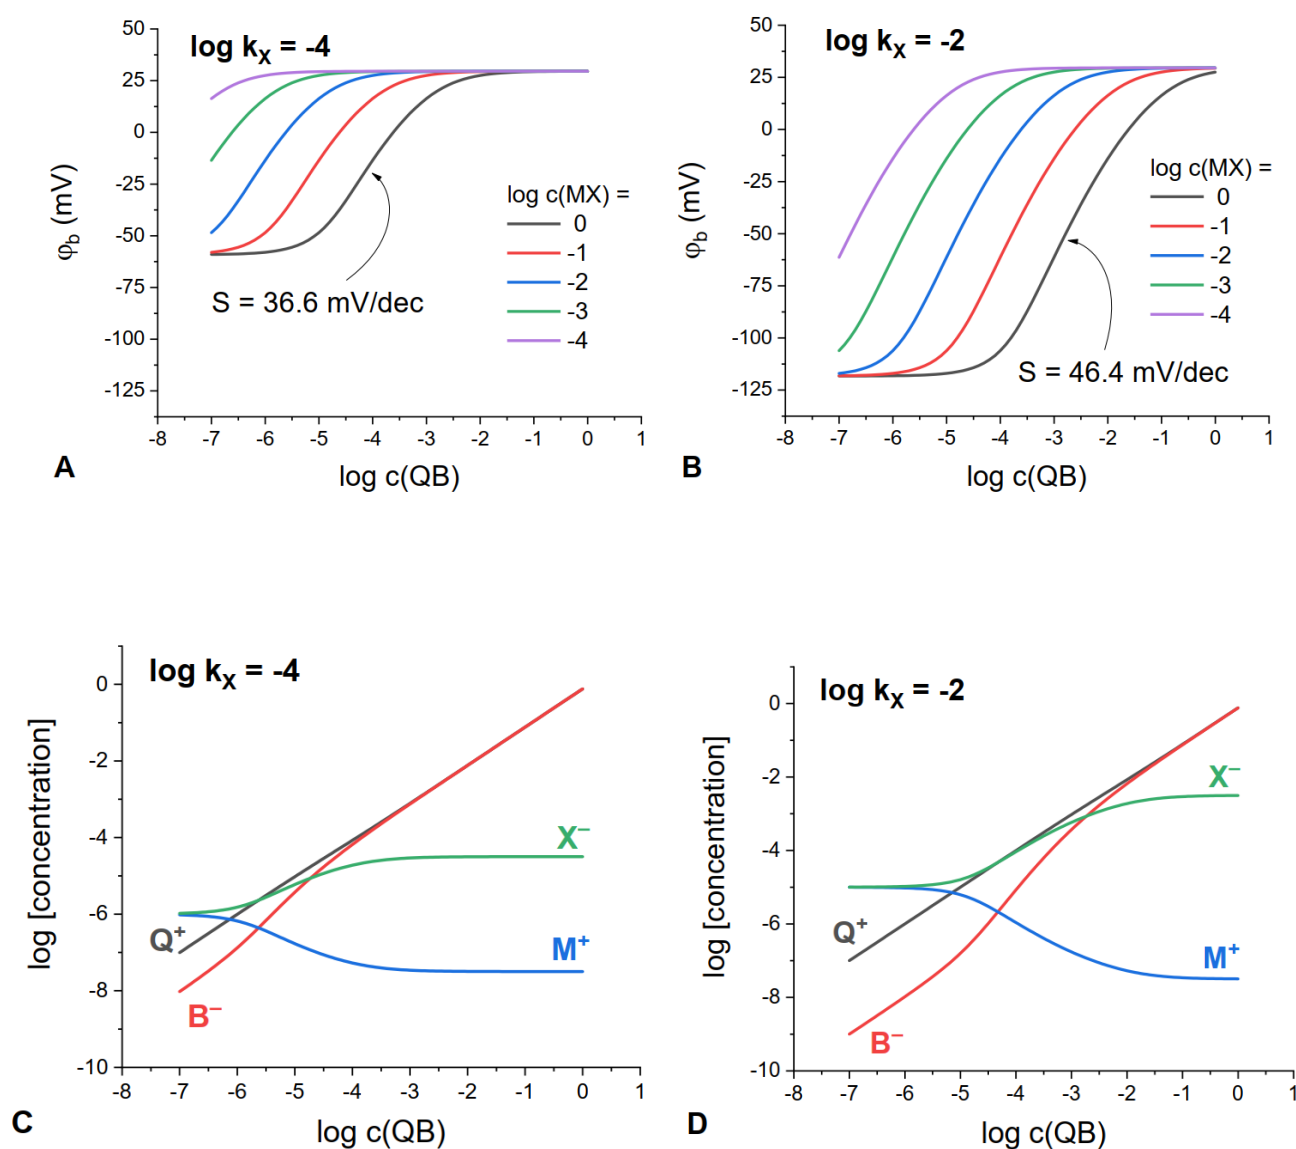

**Figure S2.** (A, B) Calculated dependences of the phase boundary potential on the  $Q^+B^-$  content in the polymeric phase at varied  $MX$  concentration in the aqueous phase (indicated in the plot) for two different partition coefficients of the aqueous anion  $X^-$ . (C, D) The respective concentration profiles in the polymeric phase at  $c(MX) = 0.1$  M. Ionic partition coefficient of  $X^-$  is indicated in the plot.  $k_M = 10^{-6}$ ;  $k_Q = 10^3$ ,  $k_B = 10^2$ .

**Table S1.** The characteristics of the response of the electrodes containing both  $KTpCIPB$  and  $ETH500$  in the membrane.

|                                                                                  | KCl            | NH <sub>4</sub> Cl | CsCl            | NaCl            |
|----------------------------------------------------------------------------------|----------------|--------------------|-----------------|-----------------|
| mean slope for Nernstian response (below equimolar $Q^+B^-$ to IR ratio), mV/dec | $57.5 \pm 0.5$ | $57.5 \pm 0.6$     | $57.4 \pm 0.4$  | $59.0 \pm 0.5$  |
| mean slope (above equimolar $Q^+B^-$ to IR ratio), mV/dec                        | $2.5 \pm 1.3$  | $5.2 \pm 1.4$      | $0.8 \pm 1.8$   | $3.8 \pm 0.8$   |
| mean E value, mV                                                                 | $99.4 \pm 5.2$ | $140.1 \pm 8.8$ mV | $125.0 \pm 4.8$ | $155.7 \pm 6.2$ |

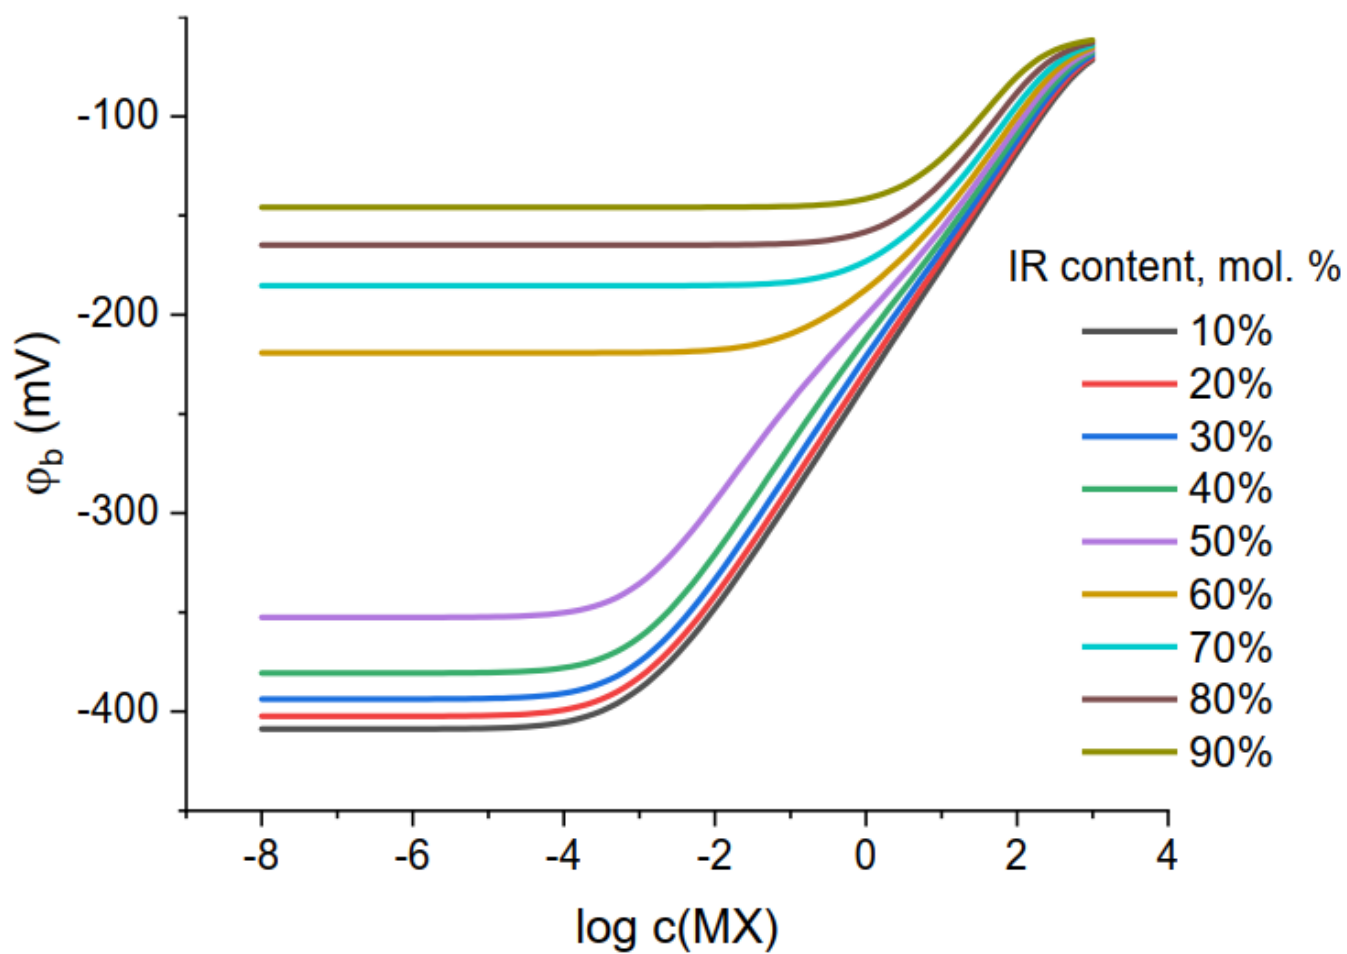

**Figure S3.** The simulated response curves for the membranes containing both IR and Q<sup>+</sup>B<sup>-</sup> in molar ratios from 10 to 90% (indicated in the plot).  $k_M = 10^{-6}$ ,  $k_X = 10^{-4}$ ;  $k_Q = 10^9$ ,  $k_B = 10^5$ ;  $k_I = 10^{-5}$ ;  $c(QB + IR) = 10^{-2}$  M.
